# Supplementary material for: Liver transcriptome analysis in gilthead sea bream upon exposure to low temperature
Source: PubMed Central journal article supplement (PMC4167152; doi:10.1186/1471-2164-15-765), 2014-09-06
Supplement: 12864_2014_6443_MOESM4_ESM.pdf [file 12864_2014_6443_MOESM4_ESM.pdf]

**TABLE A. Correlation between microarray and real-time RT-PCR expression data**

| <b>SAPD ID</b>   | <b>Gene Name</b>                           | <b>Spearman's rho<br/>Probe_1/Probe_2</b> | <b>qPCR/Probe_1</b> | <b>qPCR/Probe_2</b> |
|------------------|--------------------------------------------|-------------------------------------------|---------------------|---------------------|
| <b>SAPD23647</b> | 26S proteasome complex subunit (26S)       | 0.930**                                   | 0.347               | 0.270               |
| <b>SAPD21212</b> | Fatty acid synthase (FAS)                  | 0.951**                                   | 0.895**             | 0.951**             |
| <b>SAPD10252</b> | Glycerol-3-phosphateacyl transferase GPAT) | 0.804**                                   | 0.937**             | 0.747**             |
| <b>SAPD23278</b> | Protein kinase C (PKC)                     | 0.893**                                   | 0.930**             | 0.858**             |
| <b>SAPD20246</b> | 3-ketoacylCoA thiolase (KAT)               | 0.944**                                   | 0.867**             | 0.832**             |
| <b>SAPD11592</b> | ACP                                        | 0.958**                                   | 0.298               | 0.326               |
| <b>SAPD20810</b> | CD-59                                      | 0.965**                                   | 0.839**             | 0.881**             |
| <b>SAPD18820</b> | Interleukin-2 (ILF2)                       | 0.973**                                   | 0.879**             | 0.821**             |
| <b>SAPD02236</b> | Malate dehydrogenase (MDH)                 | 0.818**                                   | 0.053               | 0.249               |
| <b>SAPD22939</b> | Superoxide dismutase (SOD)                 | 0.453                                     | 0.502               | 0.712**             |

\*\* p <0.01

**TABLE B. Comparison of gene expression values between qRT-PCR and microarray probes for selected target genes.**

|         | SAPD23647       |       |       |       | SAPD21212 |       |       |       | SAPD10252 |       |       |       | SAPD23278 |       |       |       | SAPD20246 |       |       |       |       |
|---------|-----------------|-------|-------|-------|-----------|-------|-------|-------|-----------|-------|-------|-------|-----------|-------|-------|-------|-----------|-------|-------|-------|-------|
|         | 24h             |       | 21d   |       | 24h       |       | 21d   |       | 24h       |       | 21d   |       | 24h       |       | 21d   |       | 24h       |       | 21d   |       |       |
|         | Cold            | Ctrl  | Cold  | Ctrl  | Cold      | Ctrl  | Cold  | Ctrl  | Cold      | Ctrl  | Cold  | Ctrl  | Cold      | Ctrl  | Cold  | Ctrl  | Cold      | Ctrl  | Cold  | Ctrl  |       |
| Probe 2 | Mean expression | 0.758 | 0.839 | 2.440 | 1.004     | 2.369 | 1.067 | 5.137 | 0.732     | 6.451 | 1.220 | 5.555 | 0.990     | 0.428 | 1.072 | 2.593 | 1.076     | 0.312 | 1.294 | 0.412 | 0.903 |
|         | SD              | 0.089 | 0.142 | 0.378 | 0.031     | 0.230 | 0.094 | 0.364 | 0.325     | 1.089 | 0.217 | 0.137 | 0.036     | 0.153 | 0.068 | 0.912 | 0.410     | 0.038 | 0.380 | 0.070 | 0.141 |
| Probe 1 | Mean expression | 0.645 | 0.849 | 2.495 | 1.029     | 1.777 | 0.953 | 6.306 | 0.775     | 5.361 | 0.983 | 7.513 | 0.941     | 0.282 | 0.964 | 3.119 | 1.864     | 0.231 | 1.128 | 0.376 | 0.972 |
|         | SD              | 0.100 | 0.133 | 0.098 | 0.060     | 0.323 | 0.173 | 0.573 | 0.314     | 0.521 | 0.050 | 0.362 | 0.222     | 0.082 | 0.080 | 1.216 | 1.139     | 0.025 | 0.120 | 0.002 | 0.159 |
| qPCR    | Mean expression | 1.374 | 1.240 | 4.084 | 0.839     | 2.261 | 0.938 | 9.112 | 0.725     | 3.849 | 0.932 | 7.094 | 0.833     | 0.307 | 0.800 | 5.882 | 2.263     | 0.212 | 1.536 | 0.564 | 0.731 |
|         | SD              | 0.343 | 0.208 | 1.780 | 0.154     | 0.153 | 0.182 | 3.983 | 0.249     | 0.492 | 0.097 | 2.491 | 0.215     | 0.090 | 0.262 | 1.231 | 1.468     | 0.062 | 0.873 | 0.163 | 0.245 |

|         | SAPD11592       |       |       |       | SAPD20810 |       |       |       | SAPD18820 |       |       |       | SAPD02236 |       |       |       | SAPD22939 |       |       |       |       |
|---------|-----------------|-------|-------|-------|-----------|-------|-------|-------|-----------|-------|-------|-------|-----------|-------|-------|-------|-----------|-------|-------|-------|-------|
|         | 24h             |       | 21d   |       | 24h       |       | 21d   |       | 24h       |       | 21d   |       | 24h       |       | 21d   |       | 24h       |       | 21d   |       |       |
|         | Cold            | Ctrl  | Cold  | Ctrl  | Cold      | Ctrl  | Cold  | Ctrl  | Cold      | Ctrl  | Cold  | Ctrl  | Cold      | Ctrl  | Cold  | Ctrl  | Cold      | Ctrl  | Cold  | Ctrl  |       |
| Probe 2 | Mean expression | 0.858 | 0.924 | 1.779 | 0.961     | 0.259 | 0.885 | 0.568 | 0.888     | 2.244 | 0.768 | 9.313 | 0.860     | 0.430 | 1.036 | 0.609 | 1.190     | 1.334 | 1.029 | 1.654 | 0.999 |
|         | SD              | 0.180 | 0.099 | 0.109 | 0.033     | 0.031 | 0.141 | 0.048 | 0.415     | 0.530 | 0.372 | 0.902 | 0.302     | 0.125 | 0.090 | 0.143 | 0.167     | 0.128 | 0.177 | 0.221 | 0.081 |
| Probe 1 | Mean expression | 0.926 | 0.941 | 1.640 | 0.917     | 0.257 | 0.920 | 0.578 | 0.944     | 1.990 | 0.935 | 11.86 | 0.858     | 0.526 | 1.105 | 0.618 | 1.068     | 0.971 | 0.901 | 1.491 | 1.104 |
|         | SD              | 0.131 | 0.061 | 0.199 | 0.095     | 0.046 | 0.072 | 0.056 | 0.415     | 0.236 | 0.092 | 0.550 | 0.501     | 0.192 | 0.092 | 0.125 | 0.080     | 0.052 | 0.091 | 0.204 | 0.206 |
| qPCR    | Mean expression | 1.352 | 1.191 | 2.754 | 1.166     | 0.414 | 0.923 | 0.707 | 0.730     | 2.566 | 0.948 | 15.34 | 0.897     | 0.555 | 0.746 | 0.711 | 0.967     | 1.652 | 1.013 | 2.469 | 0.924 |
|         | SD              | 0.158 | 0.176 | 0.027 | 0.304     | 0.252 | 0.112 | 0.197 | 0.374     | 0.344 | 0.056 | 1.564 | 0.121     | 0.249 | 0.226 | 0.384 | 0.033     | 0.182 | 0.179 | 0.572 | 0.269 |
