# Supplementary material for: Liver transcriptome analysis in gilthead sea bream upon exposure to low temperature
Source: PubMed Central journal article supplement (PMC4167152; doi:10.1186/1471-2164-15-765), 2014-09-06

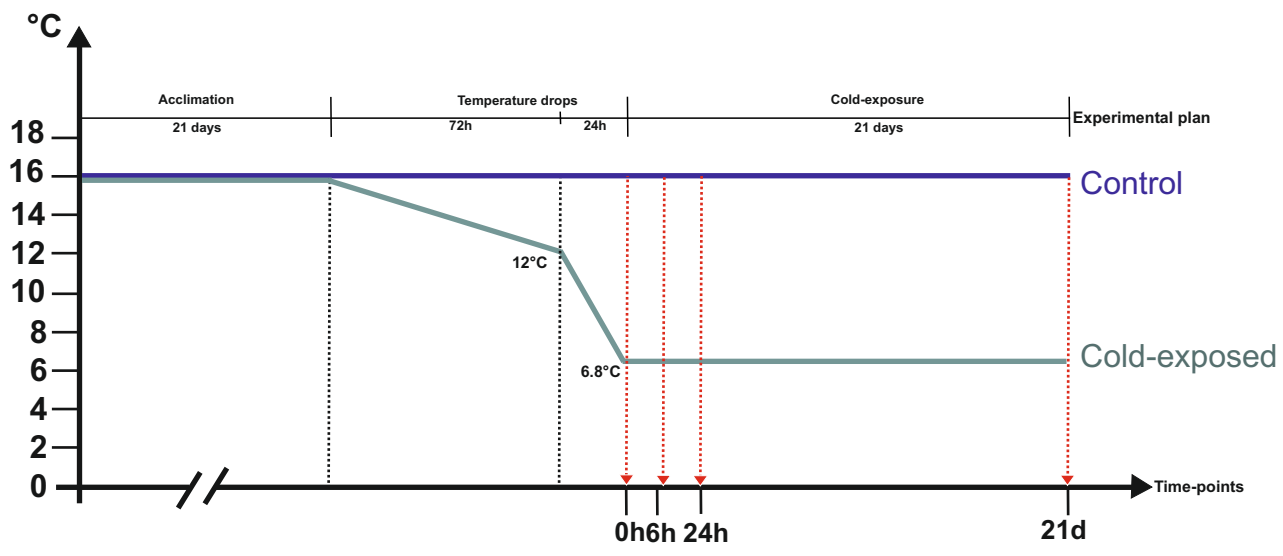

Supplement: 12864_2014_6443_MOESM5_ESM.pdf [file 12864_2014_6443_MOESM5_ESM.pdf]
