# Supplementary material for: Liver transcriptome analysis in gilthead sea bream upon exposure to low temperature
Source: PubMed Central journal article supplement (PMC4167152; doi:10.1186/1471-2164-15-765), 2014-09-06
Supplement: 12864_2014_6443_MOESM6_ESM.pdf [file 12864_2014_6443_MOESM6_ESM.pdf]

| <b>STATISTICAL</b>                                | <b>GA</b> | <b>OL</b> | <b>TN</b> | <b>DR</b> | <b>TR</b> |
|---------------------------------------------------|-----------|-----------|-----------|-----------|-----------|
| N° of annotated SAPD (blastn; e-value of 1.0 E-5) | 6,186     | 5,338     | 5,274     | 3,986     | 5,491     |
| N° of SAPD annotated with at least one species    | 7,295     |           |           |           |           |
| N° of SAPD with human homologs gene               | 6,835     |           |           |           |           |
