# Supplementary material for: Liver transcriptome analysis in gilthead sea bream upon exposure to low temperature
Source: PubMed Central journal article supplement (PMC4167152; doi:10.1186/1471-2164-15-765), 2014-09-06
Supplement: 12864_2014_6443_MOESM7_ESM.pdf [file 12864_2014_6443_MOESM7_ESM.pdf]

| <b>Gene name</b> | <b>Primer sequence</b>                                 |
|------------------|--------------------------------------------------------|
| KAT              | For_CCAGCAATCACaGAAGCTCTTA<br>Rev_CTTTGCcACaGCCAGgTACT |
| GAPT             | For_GATCCAgTAcGGAGTTCTCTACG<br>Rev_AAAGGGGCTCgGGaAACT  |
| MDH              | For_CCGTCTGGACCACAACAGA<br>Rev_GCCCCAGATGATCACATTCT    |
| 26S              | For_CAACTGGGATGATGACAAiG<br>Rev_cGTcAGCCGtTAiGAiGTCTC  |
| FAS              | For_TGTGTGCCTTCaTCCAGCA<br>Rev_AGTGCAGtaAGTCtCGGCTGAT  |
| PKC              | For_AACAGGTCGGCAAGTTCAAG<br>Rev_CAGATCCCCGaTACACGATGC  |
| ILF2             | For_CaTACAAGAAGGGCACCATGA<br>Rev_TGGACAGCACTTCaGTAGGG  |
| CD59             | For_gCAGGAGTGCACGTATGAAG<br>Rev_TGGGtGAGGCGaGAGTTATC   |
| SOD              | For_AcTCTCAgTGGgCccttgT<br>Rev_CGTTGCCcGTCTTTAGACTC    |
| ACP              | For_TTGGACCAGGTGGAGATCAT<br>Rev_AaACGTCCTTCTTGTCTGCaA  |
| RPL13a           | For_TTCTACCGCAACAAGCTGAA<br>Rev_CCCTGACAGTCCTCCAGAAG   |
